# Supplementary material for: Species-Specific Gene Expansion of the Cellulose synthase Gene Superfamily in the Orchidaceae Family and Functional Divergence of Mannan Synthesis-Related Genes in Dendrobium officinale
Source: Front Plant Sci. 2022 Jun 3;13:777332. doi: 10.3389/fpls.2022.777332 (PMC9204230; doi:10.3389/fpls.2022.777332)
Supplement: Supplementary file 11 [file Table_3.xlsx]

## Sheet: Sheet1
Table S3 FPKM values of DofCesA/DofCsl genes in four different organs (flower, root, stem and leaf) and the stems of different growing stages (Y1, Y2 and Y3) of D. officinale
Family_ID	Flower	Leaf	Root	Stem	Y1	Y2	Y3
DofCesA1	200.527	33.6767	19.4733	28.7233	26.2106	30.744	32.1466
DofCesA2	5.02667	1.65	2.49333	2.60333	6.97393	4.73176	5.92821
DofCesA3	5.02667	1.65	2.49333	2.60333	6.97393	4.73176	5.92821
DofCesA4	3.91667	0.00666667	1.37667	1.17333	6.97393	4.73176	5.92821
DofCesA5	135.877	16.3167	16.9567	15.6533	28.8632	25.9622	29.5532
DofCesA6	40.78	2.12667	3.92667	2.18667	5.16154	6.97594	7.23892
DofCesA7	3.10333	0.03	1.08	0.11	7.33269	1.1955	2.21631
DofCesA8	238.333	67.8	100.987	48.6533	209.522	132.99	113.852
DofCesA9	9.28	0.546667	0.91	0.11	4.95801	0.788643	2.76476
DofCesA10	5.02667	1.65	2.49333	2.60333	6.97393	4.73176	5.92821
DofCesA11	0.653333	0	5.44333	0.27	0.0001	0.0001	0.0001
DofCslA1	6.76667	0.01	0	33.4467	0.01	1.3761	10.232
DofCslA2	53.66	0.19	6.58333	115.573	19.7826	5.82323	143.44
DofCslA3	20.6033	0.0233333	0.24	63.4467	50.5891	174.936	76.8807
DofCslA4	10.0967	0.01	0.07	0	12.301	25.4446	33.5924
DofCslA5	8.74	0.45	0.663333	0.903333	6.27359	8.9883	28.8331
DofCslA6	124.17	0.186667	0.09	40.3658	2.63858	13.1214	66.2329
DofCslA7	8.3	0.0433333	0	80.3333	9.37896	125.107	14.2404
DofCslA8	12.2967	0.00666667	0.01	53.3333	10.2404	100.233	28.2404
DofCslA9	0	0	0	0	0.0147907	0.0001	10.001
DofCslA10	1.81333	0	0	27.34	0.0001	12.0403	35.3773
DofCslA11	13.2	0.936667	0	32.76	3.4245	0.0001	25.4233
DofCslA12	2.04	0	0	20.8567	0.0001	0.0001	0.0001
DofCslA13	6.52	2.98	2.01	16.8333	8.45274	12.7052	8.38047
DofCslA14	60.45	0.436667	0	162.667	0.0001	0.366667	335.673
DofCslA15	1.30333	0	0	160.143	0.0001	1.3761	479.45
DofCslA16	0	0	0	0	0.0001	0.0001	0.0001
DofCslA17	0.58	0.903333	0.236667	2.83333	0.0001	0.0001	3.19
DofCslA18	0.856667	0	0	20.87	0.0001	0.0001	3.19
DofCslA19	0.0966667	0	0	0	0.0001	0.0001	0.0001
DofCslH1	20.92	29.1833	66.8733	2.43667	0.0001	0.0001	0.0001
DofCslC1	18.6467	2.13667	5.66333	1.96333	4.37724	2.53748	7.48411
DofCslC2	0	0	22.8367	0	0.232943	0.244436	0.520213
DofCslC3	6.59667	8.27667	9.93333	9.18667	9.92592	9.17931	7.49372
DofCslC4	2.94333	0.0466667	0.143333	0.0366667	0.200275	0.411842	0.401974
DofCslC5	43.6033	1.32	2.49667	1.18667	3.27318	2.18855	2.58447
DofCslD1	2.54667	0.0566667	0.15	0.173333	1.9974	1.33697	1.77831
DofCslD2	3.07	0.286667	1.51667	0.00333333	0.295356	0.0922817	0.652392
DofCslD3	0.17	0.0866667	1.32	0.113333	0.295356	0.0922817	0.652392
DofCslD4	1.15	0.103333	0.736667	0.633333	2.39391	0.998433	0.494356
DofCslD5	1.46333	0.326667	0.606667	0.523333	2.81055	2.73035	3.51119
DofCslD6	14.9967	0.446667	1.35667	0.273333	0.939622	0.811236	1.09398
DofCslD7	7.47	0.303333	1.02333	0.266667	1.51758	0.827131	1.19623
DofCslD8	4.68333	0.183333	2.53667	0.34	0.0811667	0.128854	0.350006
DofCslE1	0.513333	3.09	43.0867	1.63667	5.40255	7.33676	11.8554
DofCslE2	0	1.33667	2.78667	1.20667	12.7374	19.8381	17.1393
DofCslE3	0	2.18333	0.826667	4.02333	49.0784	54.6327	59.7001
DofCslE4	1.21333	22.66	6.08333	3.13667	49.0784	54.6327	59.7001
DofCslE5	0.0733333	0.186667	2.07333	0.306667	0.834622	1.76292	0.989943
DofCslE6	0.56	26.9867	12.4633	18.1833	12.7374	19.8381	17.1393
DofCslE7	0.0733333	0.186667	2.07333	0.306667	12.7374	19.8381	17.1393
DofCslG1	128.273	17.0167	18.0867	54.5133	1.90701	13.4695	17.1735
DofCslG2	105.743	59.1667	31.9267	30.2567	1.90701	13.4695	17.1735
DofCslG3	57.2	0.696667	3.58667	4.24	0.450242	1.82818	3.56958
